# Supplementary material
Source: PubMed Central journal article supplement (PMC5802374)
Supplement: NIHMS927416-supplement-7.pdf [file NIHMS927416-supplement-7.pdf]

## Supplemental Tables

**Table S1.** Comparison of KOP-Nb39 interaction in the presence of Gai1 or  $\beta$ -arrestin2. Data represent mean  $EC_{50}$  ( $pEC_{50} \pm SEM$ ) or  $E_{max} \% \pm SEM$  and experiments were performed in triplicate. Related to Figure S1.

**Table S2.** Comparison of KOP agonists binding affinity and functional activity between KOP wt and D138<sup>3.32</sup>A mutant. Data represent mean  $K_i$  ( $pK_i \pm SEM$ ),  $EC_{50}$  ( $pEC_{50} \pm SEM$ ) or  $E_{max} \% \pm SEM$  and experiments were performed in triplicate. Related to Figure 3.

**Table S3.** Mutagenesis studies of residues in the hydrophobic binding pocket. The compounds were tested at indicated mutants in cAMP inhibition assay. Data represent mean  $EC_{50}$  ( $pEC_{50} \pm SEM$ ) or  $E_{max} \% \pm SEM$  and experiments were performed in triplicate. Related to Figure 3.

**Table S4.** Mutagenesis studies of residues in the hydrophobic binding pocket. The compounds were tested at indicated mutants in Tango  $\beta$ -arrestin2 recruitment assay. Data represent mean  $EC_{50}$  ( $pEC_{50} \pm SEM$ ) or  $E_{max} \% \pm SEM$  and experiments were performed in triplicate. Related to Figure 3.

**Table S5.** Comparison of functional activity of MP1104 and IBNtxA in  $GTP\gamma[^{35}S]$  and BRET assays. Data represent mean  $EC_{50}$  ( $pEC_{50} \pm SEM$ ) or  $E_{max} \% \pm SEM$  and experiments were performed in triplicate. Related to Figure S4.

**Table S1**

| Receptor           | BRET assay<br>(KOP-Rluc + Nb39-YFP)                |                         |                                                    |                         |                                                    |                         |
|--------------------|----------------------------------------------------|-------------------------|----------------------------------------------------|-------------------------|----------------------------------------------------|-------------------------|
|                    | MP1104                                             |                         | SalA                                               |                         | Dyn A, 1-17                                        |                         |
|                    | EC <sub>50</sub> , nM<br>(pEC <sub>50</sub> ± SEM) | E <sub>max</sub> % ±SEM | EC <sub>50</sub> , nM<br>(pEC <sub>50</sub> ± SEM) | E <sub>max</sub> % ±SEM | EC <sub>50</sub> , nM<br>(pEC <sub>50</sub> ± SEM) | E <sub>max</sub> % ±SEM |
| KOP wt             | 0.17<br>(9.77±0.08)                                | 100±2                   | 13.4<br>(7.87±0.04)                                | 100±2                   | 57.6<br>(7.24±0.11)                                | 100±5                   |
| +1 µg β-arrestin2  | 0.13<br>(9.88±0.07)                                | 112±2                   | 15.6<br>(7.81±0.04)                                | 120±2                   | 72.1<br>(7.14±0.15)                                | 150±8                   |
| +5 µg β-arrestin2  | 0.22<br>(9.65±0.08)                                | 124±1                   | 9.32<br>(8.03±0.04)                                | 130±2                   | 60.9<br>(7.22±0.14)                                | 161±3                   |
| +10 µg β-arrestin2 | 0.24<br>(9.62±0.09)                                | 138±1                   | 7.80<br>(8.11±0.04)                                | 147±2                   | 28.3<br>(7.55±0.16)                                | 161±5                   |

| Receptor    | BRET assay<br>(KOP-Rluc + Nb39-YFP)                |                         |                                                    |                         |                                                    |                         |
|-------------|----------------------------------------------------|-------------------------|----------------------------------------------------|-------------------------|----------------------------------------------------|-------------------------|
|             | MP1104                                             |                         | SalA                                               |                         | Dyn A, 1-17                                        |                         |
|             | EC <sub>50</sub> , nM<br>(pEC <sub>50</sub> ± SEM) | E <sub>max</sub> % ±SEM | EC <sub>50</sub> , nM<br>(pEC <sub>50</sub> ± SEM) | E <sub>max</sub> % ±SEM | EC <sub>50</sub> , nM<br>(pEC <sub>50</sub> ± SEM) | E <sub>max</sub> % ±SEM |
| KOP wt      | 0.19<br>(9.71±0.09)                                | 100±2                   | 12.5<br>(7.90±0.04)                                | 100±2                   | 42.8<br>(7.37±0.14)                                | 100±5                   |
| +1 µg Gai1  | 0.17<br>(9.77±0.07)                                | 81±2                    | 15.03<br>(7.82±0.06)                               | 76±2                    | 79.2<br>(7.10±0.13)                                | 62±3                    |
| +5 µg Gai1  | 0.14<br>(9.85±0.09)                                | 67±1                    | 10.9<br>(7.96±0.08)                                | 60±1                    | 117.2<br>(6.93±0.18)                               | 42±3                    |
| +10 µg Gai1 | 0.13<br>(9.88±0.11)                                | 48±1                    | 9.11<br>(8.04±0.08)                                | 43±1                    | 79.9<br>(7.09±0.20)                                | 28±3                    |

Table S2

|                     |                      | KOP wt                                            | KOP D138 <sup>3,32</sup> A |                       |
|---------------------|----------------------|---------------------------------------------------|----------------------------|-----------------------|
| Dynorphin A<br>1-17 | Ki, nM<br>(pKi ±SEM) |                                                   | 2.40<br>(8.58±0.03)        | N.D                   |
|                     | Gi                   | EC <sub>50</sub> , nM<br>(pEC <sub>50</sub> ±SEM) | 0.014<br>(10.86±0.05)      | N.D                   |
|                     |                      | E <sub>max</sub> % ±SEM                           | 100±2                      |                       |
|                     | Arrestin,            | EC <sub>50</sub> , nM<br>(pEC <sub>50</sub> ±SEM) | 20.38<br>(7.69±0.12)       | N.D                   |
|                     |                      | E <sub>max</sub> % ±SEM                           | 54±3                       |                       |
| MP1104              | Ki, nM<br>(pKi ±SEM) |                                                   | 0.22<br>(9.65±0.02)        | 0.34<br>(9.46±0.05)   |
|                     | Gi                   | EC <sub>50</sub> , nM<br>(pEC <sub>50</sub> ±SEM) | 0.003<br>(11.60±0.04)      | 0.041<br>(10.39±0.06) |
|                     |                      | E <sub>max</sub> % ±SEM                           | 102±1                      | 95±2                  |
|                     | Arrestin             | EC <sub>50</sub> , nM<br>(pEC <sub>50</sub> ±SEM) | 0.035<br>(10.45±0.03)      | 0.82<br>(9.08±0.09)   |
|                     |                      | E <sub>max</sub> % ±SEM                           | 109±5                      | 78±2                  |
| SaIA                | Ki, nM<br>(pKi ±SEM) |                                                   | 2.32<br>(8.63±0.05)        | 2.59<br>(8.58±0.05)   |
|                     | Gi                   | EC <sub>50</sub> , nM<br>(pEC <sub>50</sub> ±SEM) | 0.023<br>(10.65±0.07)      | 0.12<br>(9.93±0.05)   |
|                     |                      | E <sub>max</sub> % ±SEM                           | 104±4                      | 100±2                 |
|                     | Arrestin             | EC <sub>50</sub> , nM<br>(pEC <sub>50</sub> ±SEM) | 3.17<br>(8.50±0.05)        | 88.7<br>(7.05±0.06)   |
|                     |                      | E <sub>max</sub> % ±SEM                           | 100±2                      | 87±3                  |

N.D, no activity detected.

**Table S3**

| KOP mutation           | cAMP inhibition assay                             |                            |                                                   |                            |                                                   |                            |
|------------------------|---------------------------------------------------|----------------------------|---------------------------------------------------|----------------------------|---------------------------------------------------|----------------------------|
|                        | MP1104                                            |                            | IBNtxA                                            |                            | U69,593                                           |                            |
|                        | EC <sub>50</sub> , nM<br>(pEC <sub>50</sub> ±SEM) | E <sub>max</sub> %<br>±SEM | EC <sub>50</sub> , nM<br>(pEC <sub>50</sub> ±SEM) | E <sub>max</sub> %<br>±SEM | EC <sub>50</sub> , nM<br>(pEC <sub>50</sub> ±SEM) | E <sub>max</sub> %<br>±SEM |
| wt                     | 0.003<br>(11.60±0.02)                             | 100±1                      | 0.002<br>(11.70±0.03)                             | 102±1                      | 0.32<br>(9.50±0.04)                               | 102±2                      |
| W287 <sup>6.48</sup> L | 0.003<br>(11.60±0.05)                             | 100±1                      | 0.005<br>(11.30±0.02)                             | 102±1                      | 310<br>(6.50±0.01)                                | 89±4                       |
| G319 <sup>7.42</sup> L | 1.21<br>(8.92±0.05)                               | 100±2                      | 12.2<br>(7.91±0.05)                               | 99±2                       | 318<br>(6.50±0.08)                                | 91±5                       |
| Y320 <sup>7.43</sup> L | 0.30<br>(9.50±0.05)                               | 100±2                      | 0.91<br>(9.04±0.03)                               | 107±2                      | 291<br>(6.54±0.08)                                | 99±5                       |

| KOP mutation           | cAMP inhibition assay                             |                            |                                                   |                            |                                                   |                            |
|------------------------|---------------------------------------------------|----------------------------|---------------------------------------------------|----------------------------|---------------------------------------------------|----------------------------|
|                        | U50,488                                           |                            | Dyn A, 1-17                                       |                            | SalA                                              |                            |
|                        | EC <sub>50</sub> , nM<br>(pEC <sub>50</sub> ±SEM) | E <sub>max</sub> %<br>±SEM | EC <sub>50</sub> , nM<br>(pEC <sub>50</sub> ±SEM) | E <sub>max</sub> %<br>±SEM | EC <sub>50</sub> , nM<br>(pEC <sub>50</sub> ±SEM) | E <sub>max</sub> %<br>±SEM |
| wt                     | 0.076<br>(10.12±0.05)                             | 103±2                      | 0.01<br>(10.90±0.04)                              | 103±1                      | 0.02<br>(10.70±0.03)                              | 104±1                      |
| W287 <sup>6.48</sup> L | 0.57<br>(9.24±0.04)                               | 99±2                       | 0.90<br>(9.05±0.04)                               | 93±1                       | 9.26<br>(8.03±0.06)                               | 93±2                       |
| G319 <sup>7.42</sup> L | 75.2<br>(7.12±0.08)                               | 91±4                       | 20.5<br>(7.69±0.06)                               | 84±2                       | 492<br>(6.3±0.07)                                 | 92±5                       |
| Y320 <sup>7.43</sup> L | 30.4<br>(7.52±0.07)                               | 100±3                      | 8.74<br>(8.06±0.03)                               | 99±2                       | N.D                                               | N.D                        |

N.D, no activity detected.

**Table S4**

| KOP mutation           | $\beta$ -arrestin2 recruitment assay              |                            |                                                   |                            |                                                   |                            |
|------------------------|---------------------------------------------------|----------------------------|---------------------------------------------------|----------------------------|---------------------------------------------------|----------------------------|
|                        | MP1104                                            |                            | IBNtxA                                            |                            | U69,593                                           |                            |
|                        | EC <sub>50</sub> , nM<br>(pEC <sub>50</sub> ±SEM) | E <sub>max</sub> %<br>±SEM | EC <sub>50</sub> , nM<br>(pEC <sub>50</sub> ±SEM) | E <sub>max</sub> %<br>±SEM | EC <sub>50</sub> , nM<br>(pEC <sub>50</sub> ±SEM) | E <sub>max</sub> %<br>±SEM |
| wt                     | 0.22<br>(9.64±0.04)                               | 100±2                      | 0.31<br>(9.52±0.04)                               | 96±2                       | 6.74<br>(8.17±0.06)                               | 78±2                       |
| W287 <sup>6.48</sup> L | 2.67<br>(8.57±0.06)                               | 100±3                      | 116<br>(6.90±0.09)                                | 80±4                       | N.D                                               | N.D                        |
| G319 <sup>7.42</sup> L | 177.8<br>(6.75±0.10)                              | 100±6                      | N.D                                               | N.D                        | N.D                                               | N.D                        |
| Y320 <sup>7.43</sup> L | 58.1<br>(7.24±0.07)                               | 100±4                      | 676<br>(6.17±0.09)                                | 140±10                     | N.D                                               | N.D                        |

| KOP mutation           | $\beta$ -arrestin2 recruitment assay              |                            |                                                   |                            |                                                   |                            |
|------------------------|---------------------------------------------------|----------------------------|---------------------------------------------------|----------------------------|---------------------------------------------------|----------------------------|
|                        | U50,488                                           |                            | Dyn A, 1-17                                       |                            | SaIA                                              |                            |
|                        | EC <sub>50</sub> , nM<br>(pEC <sub>50</sub> ±SEM) | E <sub>max</sub> %<br>±SEM | EC <sub>50</sub> , nM<br>(pEC <sub>50</sub> ±SEM) | E <sub>max</sub> %<br>±SEM | EC <sub>50</sub> , nM<br>(pEC <sub>50</sub> ±SEM) | E <sub>max</sub> %<br>±SEM |
| wt                     | 3.11<br>(8.50±0.08)                               | 86±2                       | 10.5<br>(8.00±0.12)                               | 65±3                       | 8.78<br>(8.06±0.08)                               | 86±3                       |
| W287 <sup>6.48</sup> L | N.D                                               | N.D                        | N.D                                               | N.D                        | N.D                                               | N.D                        |
| G319 <sup>7.42</sup> L | 324<br>(6.49±0.10)                                | 65±6                       | N.D                                               | N.D                        | N.D                                               | N.D                        |
| Y320 <sup>7.43</sup> L | N.D                                               | N.D                        | N.D                                               | N.D                        | N.D                                               | N.D                        |

N.D, no activity detected.

**Table S5**

| Mutation                      | GTPγ[ <sup>35</sup> S] assay                          |                            |                                                       |                            |                                                       |                            |                                                       |                            |
|-------------------------------|-------------------------------------------------------|----------------------------|-------------------------------------------------------|----------------------------|-------------------------------------------------------|----------------------------|-------------------------------------------------------|----------------------------|
|                               | MP1104                                                |                            | IBNtxA                                                |                            | SalA                                                  |                            | DAMGO                                                 |                            |
|                               | EC <sub>50</sub> , nM<br>(pEC <sub>50</sub> ±<br>SEM) | E <sub>max</sub> %<br>±SEM | EC <sub>50</sub> , nM<br>(pEC <sub>50</sub> ±<br>SEM) | E <sub>max</sub> %<br>±SEM | EC <sub>50</sub> , nM<br>(pEC <sub>50</sub> ±<br>SEM) | E <sub>max</sub> %<br>±SEM | EC <sub>50</sub> , nM<br>(pEC <sub>50</sub> ±<br>SEM) | E <sub>max</sub> %<br>±SEM |
| KOP wt                        | 0.016<br>(10.78±0.07)                                 | 94±2                       | 0.018<br>(10.73±0.06)                                 | 94±2                       | 0.086<br>(10.07±0.05)                                 | 100±4                      | N.M                                                   | N.M                        |
| KOP<br>Y312 <sup>7.35</sup> W | 0.14<br>(9.86±0.05)                                   | 107±2                      | 0.10<br>(10.00±0.06)                                  | 109±2                      | 0.58<br>(9.23±0.06)                                   | 100±2                      | N.M                                                   | N.M                        |
| MOP wt                        | 0.43<br>(9.36±0.08)                                   | 101±3                      | 0.31<br>(9.51±0.05)                                   | 92±1                       | N.M                                                   | N.M                        | 1.21<br>(8.92±0.05)                                   | 98±3                       |

| Mutation                      | BRET assay                                            |                            |                                                       |                            |                                                       |                            |                                                       |                            |
|-------------------------------|-------------------------------------------------------|----------------------------|-------------------------------------------------------|----------------------------|-------------------------------------------------------|----------------------------|-------------------------------------------------------|----------------------------|
|                               | MP1104                                                |                            | IBNtxA                                                |                            | SalA                                                  |                            | DAMGO                                                 |                            |
|                               | EC <sub>50</sub> , nM<br>(pEC <sub>50</sub> ±<br>SEM) | E <sub>max</sub> %<br>±SEM | EC <sub>50</sub> , nM<br>(pEC <sub>50</sub> ±<br>SEM) | E <sub>max</sub> %<br>±SEM | EC <sub>50</sub> , nM<br>(pEC <sub>50</sub> ±<br>SEM) | E <sub>max</sub> %<br>±SEM | EC <sub>50</sub> , nM<br>(pEC <sub>50</sub> ±<br>SEM) | E <sub>max</sub> %<br>±SEM |
| KOP wt                        | 0.60<br>(9.22±0.05)                                   | 112±2                      | 0.75<br>(9.12±0.03)                                   | 116±2                      | 9.13<br>(8.04±0.05)                                   | 100±2                      | N.M                                                   | N.M                        |
| KOP<br>Y312 <sup>7.35</sup> W | 0.28<br>(9.55±0.07)                                   | 111±2                      | 9.02<br>(9.02±0.09)                                   | 70±2                       | 154<br>(6.81±0.08)                                    | 100±4                      | N.M                                                   | N.M                        |
| MOP wt<br>(+GRK2)             | 0.24<br>(9.63±0.06)                                   | 86±1                       | 0.37<br>(9.43±0.06)                                   | 51±1                       | N.M                                                   | N.M                        | 9.93<br>(8.03±0.07)                                   | 100±2                      |

N.M, not measured.
